# Supplementary material for: Blood biomarkers of neurodegeneration associate differently with amyloid deposition, medial temporal atrophy, and cerebrovascular changes in APOE ε4-enriched cognitively unimpaired elderly
Source: Research Square preprint supplement (doi:10.21203/rs.3.rs-3124100/v1), 2023-07-03
Supplement: Supplementary file 1 [file 98c3ea94c69e0534f5746bf5.docx]

Table 1 Demographics and descriptive data of the APOE ε4 homozygotes, heterozygotes, and non-carriers included in the study

|  | ***APOE ε4ε4*** | ***APOE ε4ε3*** | ***APOE ε3ε3*** | p |
| --- | --- | --- | --- | --- |
| n | 18 | 21 | 20 |  |
| Age (y), mean (SD) | 67.3 (4.74) | 67.3 (4.90) | 68.3 (4.55) | 0.75 |
| Sex (M/F),n(%) | 7/12 (37/63) | 7/14 (33/67) | 8/12 (40/60) | 0.91 |
| Education, n (%) |  |  |  | 0.37 |
| Primary school | 7 (37) | 4 (19) | 7 (35) |  |
| Middle or comprehensive school | 4 (21) | 4 (19) | 3 (15) |  |
| High school | 7 (37) | 6 (29) | 7 (35) |  |
| College or university | 1 (5) | 7 (33) | 3 (15) |  |
| MMSE, median (IQR) | 28 (27–29) | 29 (28–30) * | 29 (27–30) | **0.039** |
| BMI (kg/m2), mean (SD) | 26.6 (4.48) | 26.7 (3.46) | 27.3 (4.96) | 0.86 |
| Serum NfL pg/ml, mean (SD) | 21.1 (9.34)* | 17.8 (7.19) | 15.5 (3.83) | **0.011** |
| Plasma NTA, median (IQR) | 0.1 (0.03–0.24) | 0.1 (0.049–0.18) | 0.14 (0.05–0.25) | 0.65 |
| Plasma t-tau, mean (SD) | 1.48 (0.75) | 1.52 (0.53) | 1.46 (0.55) | 0.52 |
| Plasma GFAP, median (IQR) | 186 (124–269) | 150 (104–170) | 128 (105–147) | 0.077 |
| [11C]PIB composite SUVR, median (IQR) | 2.13(1.61–2.83)* | 1.55 (1.43–2.02) | 1.47 (1.38–1.66) | **0.0024** |
| WMH (ml), median (IQR) | 4.37 (2.58–10.45) | 4.70 (3.06–5.97) | 3.92 (1.89–8.71) | 0.36 |
| Medial temporal atrophy score, median (IQR) | 0.08 (0–0.76) | 0.09 (0–0.35) | 0.01 (0–0.36) | 0.53 |
| Global cortical atrophy score, median (IQR) | 0.12 (1.67e-7–1.12) | 0.05 (1.67e-7–0.28) | 0.04 (1.67e-7–0.34) | 0.52 |
| Hippocampus volume (ml), mean (SD) | 6.62 (0.92)* | 7.02 (0.79) | 7.27 (0.70) | **0.041** |
| Entorhinal volume (ml), mean (SD) | 4.23 (0.65) | 4.47 (0.38) | 4.52 (0.36) | 0.13 |
| Parahippocampal volume (ml), mean (SD) | 5.50 (0.71) | 5.8 (0.52) | 5.89 (0.60) | 0.12 |
|  |  |  |  |  |
| Data are presented as mean (standard deviation) or median (interquartile range) depending on the distribution. Differences between groups were tested with one-way ANOVA with Tukey's honest significance test, or Kruskal-Wallis test with Steel-Dwass method for multiple comparisons for continuous variables. χ2 test was used for testing categorical variables. P-value presents overall difference between groups. Significant differences in pairwise comparisons to APOE ε4ε4 homozygotes (*) are also presented. Abbreviations: BMI, body mass index; MMSE, mini-mental state examination; SUVR, standardized uptake value ratio; Serum NfL, Neurofilament light; Plasma NTA, N-terminal tau; Plasma t-tau, Quanterix total tau; Plasma GFAP, Glial fibrillary acidic protein; WMH, volumes of white matter hyperintensities. | | | | |

| Table 2. Model 1 Linear regression results between a blood biomarker and an imaging biomarker | | | | | | |  |  |  |  |  |  |
| --- | --- | --- | --- | --- | --- | --- | --- | --- | --- | --- | --- | --- |
|  | Serum NfL | | | Plasma NTA | | | Plasma t-tau | | | Plasma GFAP | | |
| Predictors | Estimate | R2 | p | Estimate | R2 | p | Estimate | R2 | p | Estimate | R2 | p |
| WMH, slope (95% CI) | **0.011 (0.0044 to 0.019)** | **0.18** | **0.0021** | 0.0047(-0.012 to 0.022) | 0.072 | 0.58 | -0.004 (-0.012 to 0.0036) | 0.075 | 0.29 | 0.0064 (-0.0023 to 0.015) | 0.0066 | 0.14 |
| MTA, slope (95% CI) | **0.16 (0.038 to 0.28)** | **0.14** | **0.011** | **0.42 (0.13 to 0.71)** | **0.19** | **0.0056** | 0.063 (-0.045 to 0.21) | 0.082 | 0.21 | **0.20 (0.067 to 0.34)** | **0.11** | **0.0042** |
| PiB, slope (95% CI) | 0.15 (-0.029 to 0.32) | 0.030 | 0.10 | 0.16 (-0.26 to 0.58) | -0.0080 | 0.46 | 0.074 (-0.12 to 0.27) | -0.0075 | 0.44 | **0.26 (0.069 to 0.46)** | **0.10** | **0.0088** |
| Serum NfL = neurofilament light, Plasma NTA = N-terminal tau marker, Plasma t-tau = Quanterix total tau marker, Plasma GFAP = glial fibrillary acidic protein, WMH = volumes of white matter hyperintensities, MTA = medial temporal lobe atrophy score, PiB = [11C]PiB composite score. Blood biomarker values are log transformed. WMH and MTA adjusted for MRI scanner. P < 0.05 are bolded. Blood biomarker values were log transformed. | | | | | | | | | | | | |
|  |  |  |  |  |  |  |  |  |  |  |  |  |
| Table 3. Model 2 adjusted linear regression results between a blood biomarker and an imaging biomarker | | | | | | |  |  |  |  |  |  |
|  | Serum NfL | | | Plasma NTA | | | Plasma t-tau | | | Plasma GFAP | | |
| Predictors | Estimate | R2 | p | Estimate | R2 | p | Estimate | R2 | p | Estimate | R2 | p |
| WMH, slope (95% CI) | **0.0088 (0.0019 to 0.016)** | **0.33** | **0.013** | 0.007 (-0.011 to 0.025) | 0.027 | 0.49 | -0.004 (-0.012 to 0.0037) | 0.11 | 0.28 | 0.0037 (-0.0054 to 0.013) | 0.015 | 0.41 |
| MTA, slope (95% CI) | **0.13 (0.019 to 0.24)** | **0.32** | **0.023** | **0.44 (0.13 to 0.76)** | **0.15** | **0.0063** | -0.12 (-0.010 to 0.25) | 0.14 | 0.072 | **0.22 (0.075 to 0.36)** | **0.15** | **0.0034** |
| PiB, slope (95% CI) | 0.14 (-0.026 to 0.30) | 0.20 | 0.099 | 0.12 (-0.33 to 0.56) | -0.054 | 0.60 | 0.05 (-0.15 to 0.25) | 0.045 | 0.61 | **0.27 (0.073 to 0.47)** | **0.13** | **0.0082** |
| Serum NfL = neurofilament light, Plasma NTA = N-terminal tau marker, Plasma t-tau = Quanterix total tau marker, Plasma GFAP = glial fibrillary acidic protein, WMH = volumes of white matter hyperintensities, MTA = medial temporal lobe atrophy score, PiB = [11C]PiB composite score. Blood biomarker values are log transformed. Results adjusted for Age, Sex and BMI. WMH and MTA also adjusted for MRI scanner. Significant values are bolded. Blood biomarker values were log transformed. | | | | | | | | | | | | |
|  |  |  |  |  |  |  |  |  |  |  |  |  |
| Table 4. Model 3 results for the blood biomarkers and the imaging biomarkers | | | | | | | | | | | | |
|  | Serum NfL | | | Plasma NTA | | | Plasma t-tau | | | Plasma GFAP | | |
|  | **R2 = 0.22 p = 0.0016** | | | **R2 = 0.18 p = 0.0066** | | | R2 = 0.081 p = 0.080 | | | **R2 = 0.18 p = 0.0058** | | |
| Predictors | Estimate | F ratio | Std β | Estimate | F ratio | Std β | Estimate | F ratio | Std β | Estimate | F ratio | Std β |
| WMH. slope (95% CI) | **0.0098 (0.0029 to 0.017)**** | **8.12** | **0.34** | 0.0015 (-0.015 to 0.022) | 0.032 | 0.022 | -0.0047 (-0.012 to 0.0030) | 1.51 | -0.16 | 0.0039 (-0.0041 to 0.12) | 0.95 | 0.12 |
| MTA. slope (95% CI) | **0.12 (0.0044 to 0.23)*** | **4.34** | **0.25** | **0.45 (0.13 to 0.76)**** | **8.10** | **0.37** | 0.09 (-0.042 to 0.22) | 1.85 | 0.18 | **0.16 ( 0.020 to 0.29)*** | **5.29** | **0.29** |
| PiB. slope (95% CI) | 0.058 (-0.11 to 0.23) | 0.85 | 0.11 | -0.11 (-0.51 to 0.76) | 0.28 | -0.068 | 0.017 (-0.17 to 0.21) | 0.032 | 0.025 | **0.22 (0.028 to 0.42)*** | **5.27** | **0.29** |
| Serum NfL = neurofilament light, Plasma NTA = N-terminal tau marker, Plasma t-tau = Quanterix total tau marker, Plasma GFAP = glial fibrillary acidic protein, WMH = volumes of white matter hyperintensities, MTA = medial temporal lobe atrophy score, PiB = [11C]PiB composite score, Blood biomarker values are log transformed, Results adjusted for MRI scanner. Significant values are bolded.  Blood biomarker values were log transformed. *p<0.05. **p<0.01. ***p<0.001 | | | | | | | | | | | | |
|  |  |  |  |  |  |  |  |  |  |  |  |  |
| Table 5. Model 4 adjusted results for the blood biomarkers and the imaging biomarkers | | | | | | | | | | | | |
|  | Serum NfL | | | Plasma NTA | | | Plasma t-tau | | | Plasma GFAP | | |
|  | **R2 = 0.32 p = 0.0002** | | | **R2 = 0.14 p = 0.044** | | | **R2 = 0.14 p = 0.041** | | | **R2 = 0.21 p = 0.0069** | | |
| Predictors | Estimate | F ratio | Std β | Estimate | F ratio | Std β | Estimate | F ratio | Std β | Estimate | F ratio | Std β |
| WMH. slope (95% CI) | **0.0073 (0.00038 to 0.014)*** | **4.48** | **0.25** | 0.0024 (-0.016 to 0.020) | 0.073 | 0.037 | -0.0057 (-0.014 to 0.0023) | 2.02 | -0.19 | 0.00043 (-0.0080 to 0.089) | 0.011 | 0.013 |
| MTA. slope (95% CI) | 0.10 (-0.011 to 0.21) | 3.27 | 0.21 | **0.45 (0.12 to 0.79)**** | **7.60** | **0.38** | 0.13 (-0.0024 to 0.27) | 3.90 | 0.27 | **0.18 (0.041 to 0.32)*** | **6.70** | **0.33** |
| PiB. slope (95% CI) | 0.070 (-0.087 to 0.23) | 0.38 | 0.10 | -0.092 (-0.51 to 0.33) | 0.19 | -0.059 | 0.014 (-0.18 to 0.21) | 0.022 | 0.020 | **0.23 (0.043 to 0.43)*** | **6.04** | **0.31** |
| Serum NfL = neurofilament light, Plasma NTA = N-terminal tau marker, Plasma t-tau = Quanterix total tau marker, Plasma GFAP = glial fibrillary acidic protein, WMH = volumes of white matter hyperintensities, MTA = medial temporal lobe atrophy score, PiB = [11C]PiB composite score, Blood biomarker values are log transformed, Results adjusted for Age, Sex, BMI and MRI scanner. Significant values are bolded.  Blood biomarker values were log transformed. *p<0.05. **p<0.01. ***p<0.001 | | | | | | | | | | | | |
